# Supplementary material for: Long-Term Observational Outcomes after Total Correction of Congenital Heart Disease in Korean Patients with Down Syndrome: A National Cohort Study
Source: MDPI journal article supplement (doi:10.3390/children9091329), 2022-08-31
Supplement: s1 [file s1]

**Table S1** The composition of congenital heart disease by ICD 10 code

| CHD diagnosis | ICD10 code | Congenital malformations of the circulatory system(Q20-Q28)              |
|---------------|------------|--------------------------------------------------------------------------|
| Others        | Q20.0      | Common arterial trunk                                                    |
|               | Q20.2      | Double outlet left ventricle                                             |
|               | Q21.8      | Other congenital malformations of cardiac septa                          |
|               | Q21.9      | Congenital malformation of cardiac septum, unspecified                   |
|               | Q22.2      | Congenital pulmonary valve insufficiency                                 |
|               | Q22.3      | Other congenital malformations of pulmonary valve                        |
|               | Q22.4      | Congenital tricuspid stenosis                                            |
|               | Q22.5      | Ebstein anomaly                                                          |
|               | Q22.8      | Other congenital malformations of tricuspid valve                        |
|               | Q22.9      | Congenital malformation of tricuspid valve, unspecified                  |
|               | Q23.8      | Other congenital malformations of aortic and mitral valves               |
|               | Q23.9      | Congenital malformation of aortic and mitral valves, unspecified         |
|               | Q24.2      | Cor triatriatum                                                          |
|               | Q24.5      | Malformation of coronary vessels                                         |
|               | Q24.8      | Other specified congenital malformations of heart                        |
|               | Q24.9      | Congenital malformation of heart, unspecified                            |
|               | Q25.7      | Other congenital malformations of pulmonary artery                       |
|               | Q25.8      | Other congenital malformations of great arteries                         |
|               | Q25.9      | Congenital malformation of great arteries, unspecified                   |
| DORV          | Q20.1      | Double outlet right ventricle                                            |
| TGA           | Q20.3      | Discordant ventriculoarterial connection                                 |
|               | Q20.5      | Discordant atrioventricular connection                                   |
|               | Q20.8      | Other congenital malformations of cardiac chambers and connections       |
|               | Q20.9      | Congenital malformation of cardiac chambers and connections, unspecified |
| SV            | Q20.4      | Double inlet ventricle                                                   |
|               | Q22.6      | Hypoplastic right heart syndrome                                         |
|               | Q23.4      | Hypoplastic left heart syndrome                                          |
| VSD           | Q21        | Congenital malformations of cardiac septa                                |
|               | Q21.0      | Ventricular septal defect                                                |
|               | Q21.00     | Muscular Ventricular septal defect                                       |
|               | Q21.01     | Perimembranous Ventricular septal defect                                 |
|               | Q21.08     | Other ventricular septal defect                                          |
|               | Q21.09     | Ventricular septal defect, unspecified                                   |
| ASD           | Q21.1      | Atrial septal defect                                                     |
|               | Q21.10     | Patent or persistent foramen ovale                                       |

|        |        |                                                      |
|--------|--------|------------------------------------------------------|
|        | Q21.11 |                                                      |
|        | Q21.18 | Other atrial septal defect                           |
|        | Q21.19 | Atrial septal defect, unspecified                    |
| AVSD   | Q21.2  | Atrioventricular septal defect                       |
| PDA    | Q21.4  | Aortopulmonary septal defect                         |
|        | Q25.0  | Patent ductus arteriosus                             |
| PA     | Q22.0  | Pulmonary valve atresia                              |
|        | Q25.5  | Atresia of pulmonary artery                          |
| PS     | Q22.1  | Congenital pulmonary valve stenosis                  |
|        | Q24.3  | Pulmonary infundibular stenosis                      |
|        | Q25.6  | Stenosis of pulmonary artery                         |
| AS     | Q23    | Congenital malformations of aortic and mitral valves |
|        | Q23.0  | Congenital stenosis of aortic valve                  |
|        | Q23.1  | Congenital insufficiency of aortic valve             |
|        | Q23.2  | Congenital mitral stenosis                           |
|        | Q23.3  | Congenital mitral insufficiency                      |
|        | Q24.4  | Congenital subaortic stenosis                        |
| CoA    | Q25.1  | Coarctation of aorta                                 |
|        | Q25.2  | Atresia of aorta                                     |
|        | Q25.3  | Stenosis of aorta                                    |
|        | Q25.4  | Other congenital malformations of aorta              |
| TAPVR  | Q26.2  | Total anomalous pulmonary venous connection          |
| &PAPVR | Q26.3  | Partial anomalous pulmonary venous connection        |
|        | Q26.4  | Anomalous pulmonary venous connection, unspecified   |
| TOF    | Q21.3  | Tetralogy of Fallot                                  |

---

*CHD* congenital heart disease, *AVSD* atrioventricular septal defect, *TOF* tetralogy of Fallot, *TGA* transposition of great arteries, *SV* single ventricle, *CoA* coarctation of aorta, *DORV* double outlet right ventricle, *VSD* ventricular septal defect, *PA* pulmonary atresia, *AS* aortic valve stenosis, *PS* pulmonary stenosis, *PDA* patent ductus arteriosus, *ASD* atrial septal defect, *TAPVR&PAPVR* total anomalous pulmonary venous return&partial anomalous pulmonary venous return.

**Table S2** The surgical procedures performed for congenital heart disease in patients with and without Down syndrome

| Operation        | Surgical code <sup>a</sup>  | Operation name                                                         |
|------------------|-----------------------------|------------------------------------------------------------------------|
| Total correction |                             |                                                                        |
|                  | IF180ZN                     | Total Correction of Tetralogy of Fallot                                |
|                  | IF18101ZN IF18102ZN IF181ZN | Operation Of Ventricular Septal Defect and Pulmonary Valvular Stenosis |
|                  | IF1826ZN                    | RVOT Reconstruction                                                    |
|                  | IF182AZN                    | Repair Of Endocardial Cushion Defect-Partial                           |
|                  | IF182BZN                    | Repair Of Endocardial Cushion Defect-Complete                          |
|                  | IF18502ZN IF185ZN           | Repair Of Complicated Congenital Heart Diseases                        |
|                  | IF1861ZN                    | Left And Right Pulmonary Artery Reconstruction                         |
|                  | IF18701ZN                   | Rastelli's Operation                                                   |
|                  | IF18702ZN                   | Repair Of Total Anomalous Pulmonary Venous Return                      |
|                  | IF18501ZN                   | Repair Of Transposition of Great Arteries                              |
|                  | IF187BZN                    | Functional Correction of Single Ventricle-Fontan Operation             |
|                  | IF1701B                     | Relief Of Pulmonary Artery Banding                                     |
|                  | IF171ZN                     | Operation Of Atrial Septal Defect                                      |
|                  | IF1711ZN                    | Operation Of Atrial Septal Defect (Minimally Invasive Surgery)         |
|                  | IF177ZN                     | Operation Of Atrial Septal Defect and Pulmonary Valvular Stenosis      |
|                  | IF172ZN                     | Operation Of Ventricular Septal Defect                                 |
|                  | IF167ZN                     | Operation Of Patent Ductus Arteriosus                                  |
| Palliation       |                             |                                                                        |
|                  | IF1701A                     | Pulmonary Artery Banding                                               |
|                  | IF170A IF17007 IF17006      | Shunt Procedure                                                        |
|                  | IF187AZN                    | Functional Correction of Single Ventricle-Glenn Operation              |

<sup>a</sup>The surgical code is based on the international standard operating code of ICD-9-CM (International Classification of Diseases, Ninth Revision, Clinical Modification), which is an international standard. It was selected as a surgical code for each operation.

**Table S3** Clinical characteristics of the participants with and without Down syndrome underwent total correction for congenital heart disease

| Clinical Characteristics                                                                       | Observed data (N = 5,282)                     |             |                  | Propensity matched data (N = 4,635)           |           |                  |
|------------------------------------------------------------------------------------------------|-----------------------------------------------|-------------|------------------|-----------------------------------------------|-----------|------------------|
|                                                                                                | Total correction for CHD, N. (%) <sup>a</sup> |             |                  | Total correction for CHD, N. (%) <sup>a</sup> |           |                  |
|                                                                                                | Control                                       | Down        | SMD <sup>b</sup> | Control                                       | Down      | SMD <sup>b</sup> |
| Total, n                                                                                       | 5,048                                         | 243         |                  | 4,482                                         | 153       |                  |
| Certain Conditions Originating in the Perinatal Period <sup>c</sup>                            |                                               |             |                  |                                               |           |                  |
| Maternal factors                                                                               | 214 (4.2)                                     | 14 (6.0)    | 0.07             | 193 (4.3)                                     | 8 (5.2)   | 0.03             |
| Disorders related to length of gestation and fetal                                             | 588 (11.6)                                    | 44 (18.8)   | 0.23             | 511 (11.4)                                    | 21 (13.7) | 0.05             |
| Birth trauma                                                                                   | 56 (1.10)                                     | 2 (0.9)     | -0.00            | 51 (1.1)                                      | 1 (0.7)   | -0.08            |
| Respiratory and cardiovascular disorder specific to the perinatal period                       | 960 (18.9)                                    | 59 (25.2)   | 0.18             | 831 (18.5)                                    | 32 (20.9) | 0.04             |
| Infections specific to the perinatal period                                                    | 877 (17.3)                                    | 57 (24.4)   | 0.16             | 794 (17.7)                                    | 37 (24.2) | 0.15             |
| Haemorrhagic and hematological disorders of fetus and newborn                                  | 1,919 (37.7)                                  | 130 (55.6)  | 0.29             | 1,767 (39.4)                                  | 64 (41.8) | 0.04             |
| Transitory endocrine and metabolic disorders                                                   | 645 (12.7)                                    | 31 (13.2)   | -0.02            | 587 (13.1)                                    | 21 (13.7) | 0.02             |
| Digestive system disorders of fetus and newborn                                                | 125 (2.5)                                     | 12 (5.1)    | 0.15             | 116 (2.6)                                     | 3 (2.0)   | -0.02            |
| Conditions involving the integument and temperature regulation                                 | 166 (3.3)                                     | 7 (3.0)     | -0.01            | 154 (3.4)                                     | 4 (2.6)   | -0.05            |
| Congenital malformations, deformations and other disorders originating in the perinatal period | 397 (7.8)                                     | 15 (6.4)    | -0.05            | 356 (7.9)                                     | 16 (10.5) | 0.10             |
| Chromosomal abnormality <sup>d</sup>                                                           |                                               |             |                  |                                               |           |                  |
| Congenital malformations of the nervous system                                                 | 135 (2.70)                                    | 5 (2.1)     | 0.02             | 107 (2.4)                                     | 9 (5.9)   | 0.22             |
| Congenital malformations of eye, ear, face and neck                                            | 308 (6.10)                                    | 40 (17.1)   | 0.34             | 304 (6.8)                                     | 18 (11.8) | 0.16             |
| Congenital malformations of the circulatory system                                             | 5,048 (100.0)                                 | 234 (100.0) | -                | 4,482 (100)                                   | 153 (100) | -                |
| Congenital malformations of the respiratory system                                             | 200 (3.90)                                    | 5 (2.1)     | -0.16            | 159 (3.5)                                     | 4 (2.6)   | -0.07            |
| Cleft lip and cleft palate                                                                     | 67 (1.30)                                     | 3 (1.3))    | -0.00            | 52 (1.2)                                      | 8 (5.2)   | 0.35             |
| Congenital malformations of the digestive system                                               | 424 (8.30)                                    | 24 (10.3)   | 0.07             | 385 (8.6)                                     | 12 (7.8)  | -0.02            |

|                                                                         |            |           |       |           |          |       |
|-------------------------------------------------------------------------|------------|-----------|-------|-----------|----------|-------|
| Congenital malformations of genital organs                              | 196 (3.90) | 12 (5.1)  | 0.07  | 176 (3.9) | 7 (4.6)  | 0.02  |
| Congenital malformations of the urinary system                          | 115 (2.30) | 8 (3.4)   | 0.06  | 101 (2.3) | 5 (3.3)  | 0.07  |
| Congenital malformations and deformations of the musculoskeletal system | 409 (8.00) | 42 (17.9) | 0.29  | 391 (8.7) | 14 (9.2) | 0.01  |
| Other congenital malformation                                           | 209 (4.10) | 5 (2.1)   | -0.09 | 166 (3.7) | 4 (2.6)  | -0.07 |

<sup>a</sup>Values are N(%) unless otherwise indicated.

<sup>b</sup>SMD, standardized mean difference. ; a value greater than 10% is interpreted as a meaningful difference.

<sup>c</sup> Certain Conditions Originating in the Perinatal Period is recorded using ICD-10 codes of P00 to P96.

<sup>d</sup>Chromosomal abnormality is recorded using ICD-10 codes of Q00X to Q89.

**Table S4** Clinical characteristics of congenital heart disease of the participants with and without Down syndrome underwent total correction for congenital heart disease

| CHD         | Observed data (N =5,282)                      |           |                  | Propensity matched data (N =4,635)            |           |                  |
|-------------|-----------------------------------------------|-----------|------------------|-----------------------------------------------|-----------|------------------|
|             | Total correction for CHD, N. (%) <sup>a</sup> |           |                  | Total correction for CHD, N. (%) <sup>a</sup> |           |                  |
|             | Control                                       | Down      | SMD <sup>b</sup> | Control                                       | Down      | SMD <sup>b</sup> |
| Total, n    | 5,048                                         | 243       |                  | 4,482                                         | 153       |                  |
| AVSD        | 585 (11.5)                                    | 89 (38.0) | 0.63             | 550 (12.3)                                    | 23 (15.0) | 0.06             |
| TOF         | 844 (16.6)                                    | 19 (8.1)  | -0.21            | 723 (16.1)                                    | 29 (19.0) | 0.08             |
| TGA         | 396 (7.8)                                     | 2 (0.9)   | -0.39            | 319 (7.1)                                     | 0 (0.0)   | -0.38            |
| SV          | 170 (3.3)                                     | 0 (0.0)   | -0.24            | 126 (2.8)                                     | 0 (0.0)   | -0.23            |
| CoA         | 346 (6.8)                                     | 7 (3.0)   | -0.12            | 294 (6.6)                                     | 12 (7.8)  | 0.04             |
| DORV        | 113 (2.2)                                     | 6 (2.6)   | 0.00             | 93 (2.1)                                      | 6 (3.9)   | 0.11             |
| VSD         | 1,640 (32.3)                                  | 91 (38.9) | 0.08             | 1517 (33.8)                                   | 59 (38.6) | 0.09             |
| PA          | 43 (0.8)                                      | 1 (0.4)   | -0.04            | 39 (0.9)                                      | 2 (1.3)   | -0.00            |
| AS          | 27 (0.5)                                      | 0 (0.0)   | -0.10            | 22 (0.5)                                      | 0 (0.0)   | -0.09            |
| PS          | 112 (2.2)                                     | 1 (0.4)   | -0.15            | 102 (2.3)                                     | 1 (0.7)   | -0.14            |
| PDA         | 137 (2.7)                                     | 5 (2.1)   | 0.00             | 119 (2.7)                                     | 7 (4.6)   | 0.11             |
| ASD         | 568 (11.2)                                    | 13 (5.6)  | -0.21            | 525 (11.7)                                    | 16 (10.5) | -0.04            |
| TAPVR&PAPVR | 46 (0.9)                                      | 0 (0.0)   | -0.12            | 36 (0.8)                                      | 0 (0.0)   | -0.12            |
| OTHERS      | 21 (0.4)                                      | 0 (0.0)   | -0.08            | 16 (0.4)                                      | 0 (0.0)   | -0.08            |

<sup>a</sup>Values are N(%) unless otherwise indicated.

<sup>b</sup>SMD, standardized mean difference. ; a value greater than 10% is interpreted as a meaningful difference.

CHD, congenital heart disease; AVSD, atrioventricular septal defect; TOF, tetralogy of Fallot; TGA, transposition of great arteries; SV, single ventricle; CoA, coarctation of aorta; DORV, double outlet right ventricle; VSD, ventricular septal defect; PA, pulmonary atresia; AS, aortic valve stenosis; PS, pulmonary stenosis; PDA, patent ductus arteriosus; ASD, atrial septal defect; TAPVR&PAPVR, total anomalous pulmonary venous return& partial anomalous pulmonary venous return.
